# Supplementary material for: Quantifying the added value of convection-permitting climate simulations in complex terrain: a systematic evaluation of WRF over the Himalayas
Source: Copernicus journal article supplement (doi:10.5194/esd-8-507-2017), 2017-07-05
Supplement: Supplementary file 1 [file esd-8-507-2017-supplement.pdf]

Supplement of Earth Syst. Dynam., 8, 507–528, 2017  
<https://doi.org/10.5194/esd-8-507-2017-supplement>  
© Author(s) 2017. This work is distributed under  
the Creative Commons Attribution 3.0 License.

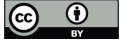

*Supplement of*

## **Quantifying the added value of convection-permitting climate simulations in complex terrain: a systematic evaluation of WRF over the Himalayas**

**Ramchandra Karki et al.**

*Correspondence to:* Ramchandra Karki ([ramchandra.karki@studium.uni-hamburg.de](mailto:ramchandra.karki@studium.uni-hamburg.de))

The copyright of individual parts of the supplement might differ from the CC BY 3.0 License.

**Supplement:**

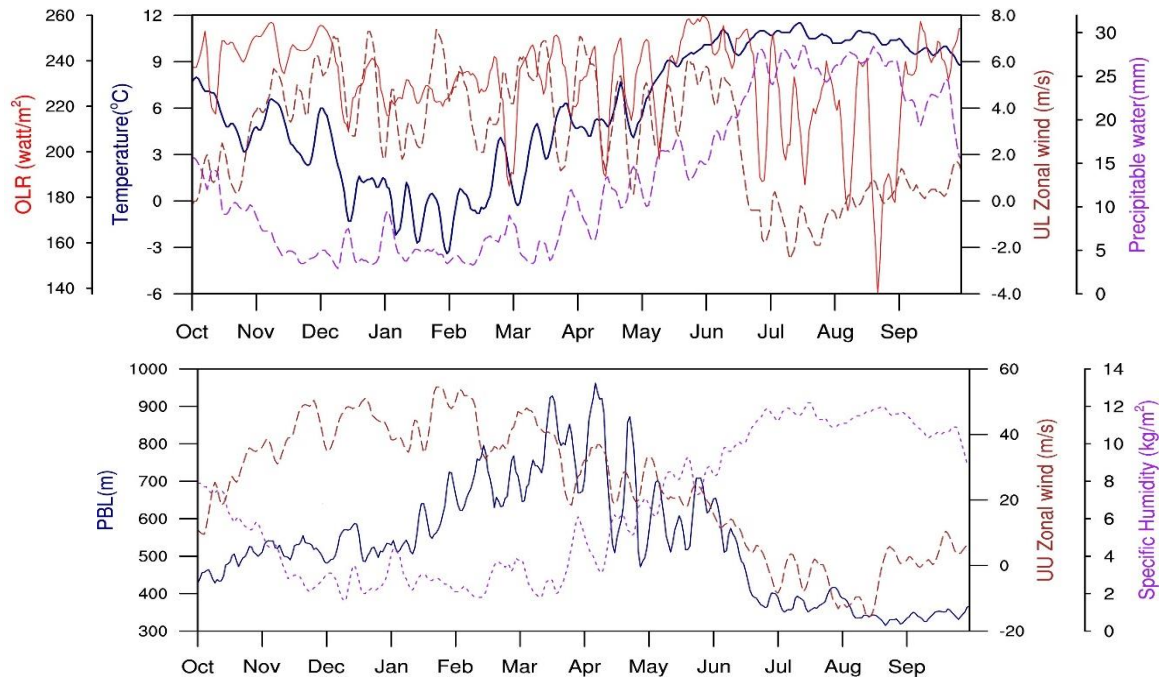

**Figure S1:** Time series of various dynamic and thermodynamic parameters (D3 domain averaged): lower level (averaged for lowest 100 hPa) zonal wind (UL m/s) and air temperature (°C), perceptible water (mm) and, total out going long wave radiation (OLR) (watt/m<sup>2</sup>), upper level (300-150hPa averaged) zonal wind (UU), lower level (averaged for lowest 100hPa) specific humidity (g/kg), and planetary boundary layer (PBL) height (m) plotted as five days running mean.

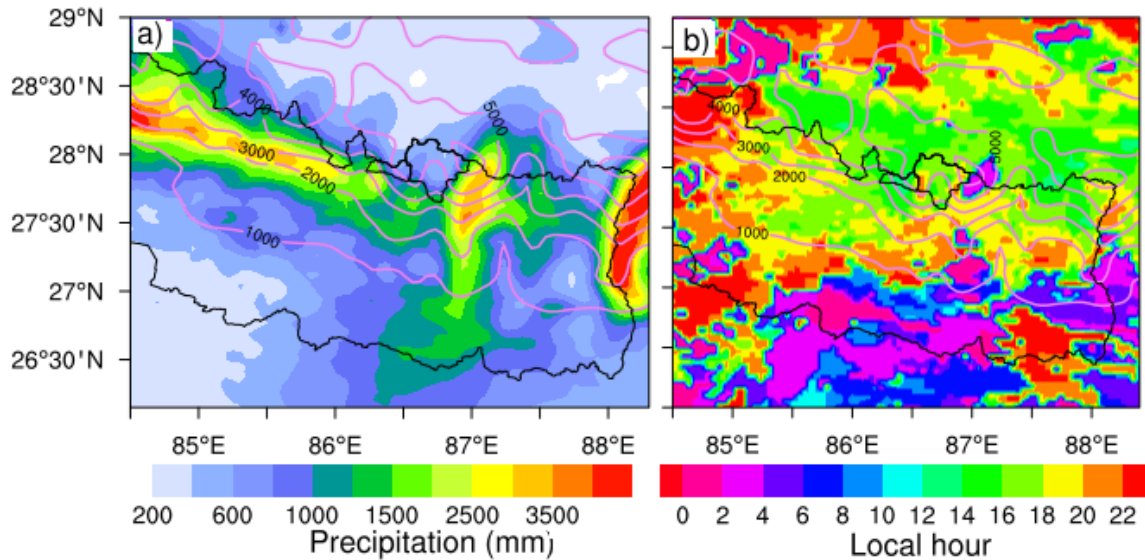

**Figure S2:** Spatial distribution of a) monsoonal precipitation (mm) and b) maximum precipitation hour in D2\_st domain (shaded). Elevation contour from WRF D2\_st topography is also plotted and labelled at every 1000 m.
